# Supplementary material for: Whole-Genome Sequencing of a Potential Ester-Synthesizing Bacterium Isolated from Fermented Golden Pomfret and Identification of Its Lipase Encoding Genes
Source: MDPI journal article supplement (doi:10.3390/foods11131954), 2022-06-30
Supplement: s1 [file s1]

Supplementary Materials:

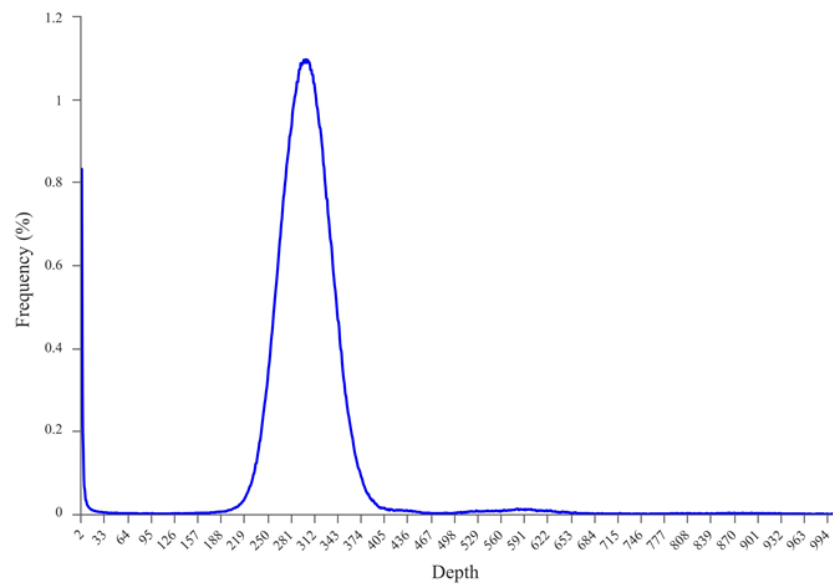

Figure S1. kmer=17 Depth-Frequency Distribution.

Table S1. General characteristics of *Acinetobacter venezia* SCSMX-3 genome.

| Characteristic         | Chromosome | Plasmid A | Plasmid B |
|------------------------|------------|-----------|-----------|
| Gene Total Length (bp) | 3363135    | 14425     | 11249     |
| G+C content (%)        | 39.18%     | 33.73%    | 36.15%    |
| ORFs                   | 3212       | 12        | 17        |
| 5s_rRNA                | 6          | -         | -         |
| 16s_rRNA               | 6          | -         | -         |
| 23s_rRNA               | 6          | -         | -         |
| tRNA                   | 74         | -         | -         |
| A-base content         | 1026554    | 4544      | 3703      |
| T-base content         | 1018779    | 5015      | 3479      |
| G-base content         | 662299     | 2225      | 1887      |
| C-base content         | 655503     | 2640      | 2180      |
| tandem repeat          | 67         | 1         | 1         |

**Table S2.** NR data esterase (lipase) annotation information.

| Gene ID  | Hit-Description                                       | Gene Len | Identity | Evalue    | KEGG Name | KEGG Functional Role                                         |
|----------|-------------------------------------------------------|----------|----------|-----------|-----------|--------------------------------------------------------------|
| gene0072 | phosphatidylglycerophosphatase A                      | 173      | 99.4     | 4.10E-96  | pgpA      | Phosphatidylglycerophosphatase (3.1.3.27)                    |
| gene0212 | imidazole glycerol phosphate synthase subunit HisH    | 205      | 100      | 7.60E-118 |           |                                                              |
| gene0302 | triacylglycerol lipase                                | 323      | 99.1     | 5.90E-181 | lip       | Triacylglycerol lipase(3.1.1.3)                              |
| gene0370 | acyl-CoA thioesterase II                              | 290      | 99.3     | 9.00E-165 | tesB      | Thioester hydrolases (3.1.2.-)                               |
| gene0476 | phospholipase D family protein                        | 542      | 99.6     | 0         |           |                                                              |
| gene0477 | metallophosphoesterase                                | 336      | 100      | 8.80E-196 |           |                                                              |
| gene0490 | acyl-CoA thioesterase                                 | 139      | 99.3     | 8.10E-71  | yciA      | Thioester hydrolases (3.1.2.-)                               |
| gene0780 | Pimeloyl-[acyl-carrier protein] methyl ester esterase | 249      | 90.4     | 1.40E-121 |           |                                                              |
| gene0820 | patatin-like phospholipase family proteinPatatin-like | 596      | 99.8     | 0         |           |                                                              |
| gene0897 | thioesterase family protein                           | 165      | 99.4     | 1.00E-88  |           |                                                              |
| gene1060 | glycerophosphodiester phosphodiesterase               | 186      | 93.5     | 6.50E-92  | glpQ      | glycerophosphodiester phosphodiesterase (3.1.4.46)           |
| gene1150 | Paal family thioesterase                              | 144      | 100      | 1.70E-76  | -         | -                                                            |
| gene1263 | 3-oxoadipate enol-lactonase                           | 261      | 97.3     | 3.80E-138 | -         | -                                                            |
| gene1316 | acyl-CoA thioesterase                                 | 131      | 96.2     | 1.00E-67  | ybgC      | Thioester hydrolases (3.1.2.-)                               |
| gene1358 | beta-ketoacyl-ACP synthase III                        | 368      | 100      | 1.50E-201 | -         | -                                                            |
| gene1376 | triacylglycerol lipase                                | 411      | 98.8     | 1.60E-228 | -         | -                                                            |
| gene1402 | triacylglycerol lipase                                | 127      | 100      | 4.30E-63  | lip       | triacylglycerol lipase (3.1.1.3)                             |
| gene1550 | phospholipase A                                       | 389      | 99.2     | 2.00E-223 | -         | -                                                            |
| gene1569 | lipase                                                | 239      | 97.1     | 3.60E-127 | -         | -                                                            |
| gene1587 | phospholipase D family protein                        | 482      | 99.2     | 1.40E-279 | -         | -                                                            |
| gene1778 | acyl-CoA thioesterase                                 | 146      | 100      | 7.90E-77  | ybgC      | Thioester hydrolases (3.1.2.-)                               |
| gene1941 | Paal family thioesterase                              | 138      | 99.3     | 2.30E-70  | -         | -                                                            |
| gene1968 | esterase                                              | 420      | 97.9     | 3.80E-241 | -         | -                                                            |
| gene2130 | acyl-CoA thioesterase                                 | 154      | 98.1     | 1.50E-81  | ybgC      | Thioester hydrolases (3.1.2.-)                               |
| gene2138 | esterase                                              | 200      | 95       | 1.10E-105 | -         | -                                                            |
| gene2298 | arylesterase                                          | 209      | 100      | 7.80E-110 | tesA      | acyl-CoA thioesterase I (EC:3.1.2.- 3.1.2.2 3.1.1.2 3.1.1.5) |
| gene2300 | Lipase 1 precursor                                    | 338      | 99.7     | 5.70E-187 | -         | -                                                            |
| gene2309 | diacylglycerol kinase                                 | 124      | 100      | 1.70E-56  | dgkA      | diacylglycerol kinase (ATP) (2.7.1.107)                      |
| gene2314 | metallophosphoesterase                                | 251      | 98.8     | 3.90E-148 | -         | -                                                            |
| gene2320 | glycerol kinase GlpK                                  | 504      | 99.8     | 2.90E-296 | -         | -                                                            |
| gene2337 | acyl-CoA thioesterase                                 | 173      | 96.5     | 1.70E-89  | -         | -                                                            |
| gene2370 | glycerophosphodiester phosphodiesterase               | 378      | 97.9     | 3.30E-215 | glpQ      | glycerophosphodiester phosphodiesterase (3.1.4.46)           |
| gene2467 | patatin-like phospholipase family proteinpatatin      | 318      | 100      | 1.90E-163 | -         | -                                                            |
| gene2508 | patatin-like phospholipase family proteinpatatin      | 314      | 99.4     | 1.30E-169 | -         | -                                                            |
| gene2600 | glycerophosphodiester phosphodiesterase               | 239      | 99.2     | 4.70E-135 | glpQ      | glycerophosphodiester phosphodiesterase (3.1.4.46)           |
| gene2617 | phospholipase                                         | 254      | 95.7     | 1.60E-136 | -         | -                                                            |
| gene2650 | beta-ketoacyl-ACP synthase                            | 407      | 99.8     | 3.90E-230 | -         | -                                                            |
| gene2658 | acyl-CoA thioesterase                                 | 142      | 100      | 3.10E-78  | ybgC      | Thioester hydrolases (3.1.2.-)                               |
| gene2667 | beta-ketoacyl synthase chain length factor            | 204      | 100      | 3.10E-111 | plc       | phospholipase C (3.1.4.3)                                    |
| gene2695 | sphingomyelin phosphodiesterase                       | 448      | 99.3     | 1.30E-255 | -         | -                                                            |
| gene3145 | phospholipase C, phosphocholine-specific              | 726      | 99.6     | 0         | -         | -                                                            |

**Table S3.** NR data esterase (lipase) annotation information.

|           | <b>Alpha helix</b> | <b>Extended strand</b> | <b>Random coil</b> |
|-----------|--------------------|------------------------|--------------------|
| DSC       | 24.46%             | 13.31%                 | 62.23%             |
| HNNC      | 28.79%             | 20.43%                 | 50.77%             |
| MLRC      | 30.34%             | 15.48%                 | 54.18%             |
| PHD       | 33.75%             | 26.32%                 | 39.94%             |
| Predator  | 11.76%             | 20.43%                 | 67.80%             |
| Sec.Cons. | 24.46%             | 15.17%                 | 56.04%             |
